# Supplementary material for: Simple mechanisms of CH4 reforming with CO2 and H2O on a supported Ni/ZrO2 catalyst
Source: Royal Society of Chemistry journal article supplement (doi:10.1039/d1cp04048k), 2021-01-01
Supplement: d1cp04048k1.pdf [file d1cp04048k1.pdf]

## Electronic Supplementary Information (ESI)

### Simple Mechanisms of CH<sub>4</sub> Reforming with CO<sub>2</sub> and H<sub>2</sub>O on Supported Ni/ZrO<sub>2</sub> Catalyst

Hui Yang,<sup>†,‡,§</sup> Hui Wang,<sup>†,‡,§</sup> Lisha Wei,<sup>†,‡,§</sup> Yong Yang,<sup>†,‡</sup> Yong-Wang Li,<sup>†,‡</sup> Xiao-dong Wen<sup>\*,†,‡</sup> and Haijun Jiao<sup>\*,||</sup>

<sup>†</sup>State Key Laboratory of Coal Conversion, Institute of Coal Chemistry, Chinese Academy of Sciences, Taiyuan, 030001, China.

<sup>‡</sup>National Energy Center for Coal to Liquids, Synfuels China Co., Ltd, Huairou District, Beijing, 101400, China

<sup>§</sup>University of Chinese Academy of Sciences, No. 19A Yuquan Road, Beijing, 100049, China

<sup>||</sup>Leibniz-Institut für Katalyse e.V., Albert-Einstein-Str. 29a, Rostock, 18059, Germany

### Table of Contents

Micro-kinetics:

Figure S1. Stable adsorption structures and sequential adsorption energies of Ni<sub>n</sub> ( $n = 1-13$ ) on *t*-ZrO<sub>2</sub>(101)

Figure S2. Energy profiles of possible pathways for CO<sub>2</sub> reforming of CH<sub>4</sub> on Ni<sub>13</sub>/*t*-ZrO<sub>2</sub>(101) surface reported in literature along with the computational methods

Figure S3. Simplified Gibbs free energy profiles of CO<sub>2</sub> reforming of CH<sub>4</sub> on Ni<sub>13</sub>/*t*-ZrO<sub>2</sub>(101)

Figure S4. Energy surface of possible pathways for steam reforming of CH<sub>4</sub> on Ni<sub>13</sub>/*t*-ZrO<sub>2</sub>(101)

Figure S5. Simplified Gibbs free energy profiles of H<sub>2</sub>O reforming of CH<sub>4</sub> on Ni<sub>13</sub>/*t*-ZrO<sub>2</sub>(101)

Table S1. Forward reaction rate constant (s<sup>-1</sup>) for elementary reactions in methane reforming on Ni/*t*-ZrO<sub>2</sub> catalyst under different conditions

Table S2. Computed activation energy ( $E_a$ , eV) and reaction energy ( $\Delta H$ , eV) of individual elementary reactions on the Ni(111)

References

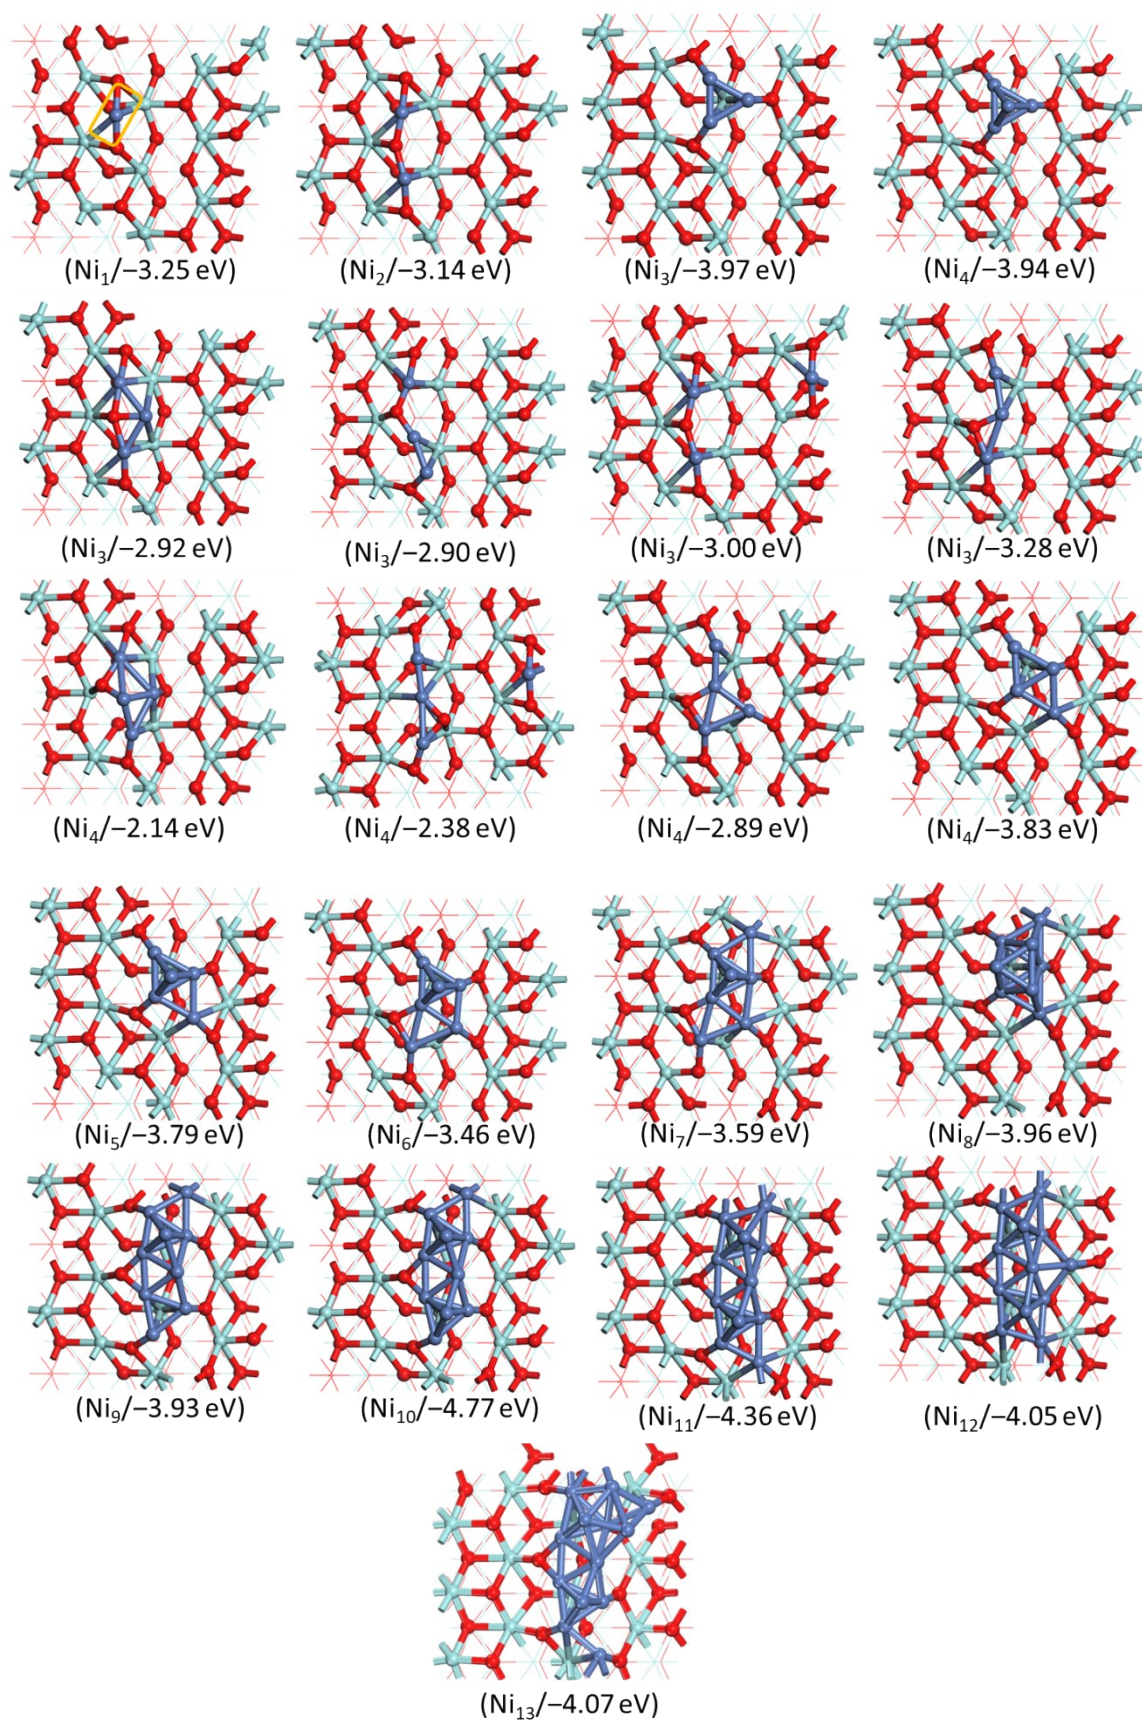

**Figure S1.** Stable adsorption structures of Ni<sub>n</sub> ( $n = 1-13$ ) on *t*-ZrO<sub>2</sub>(101) with the sequential adsorption energy in parenthesis (white-blue, red and blue balls for Zr, O and Ni atoms, respectively)

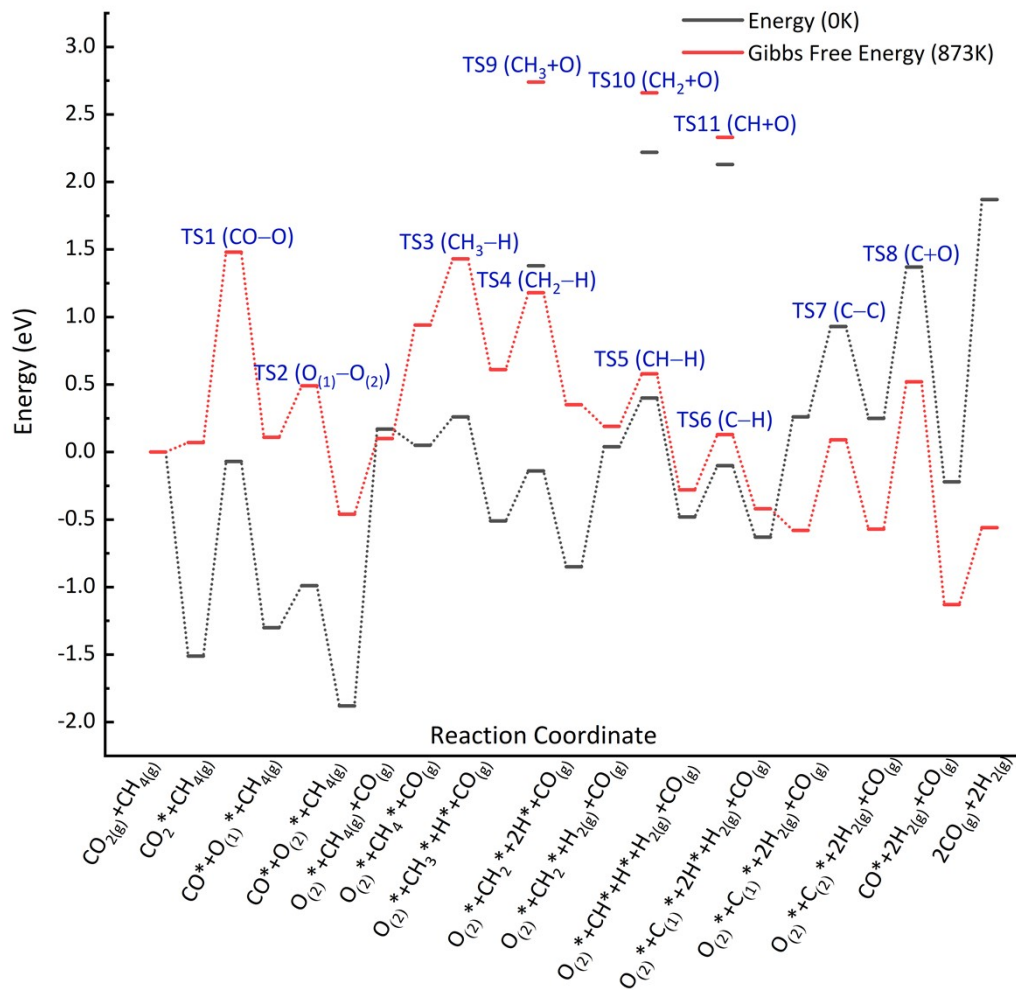

**Figure S2.** Energy profile of possible pathway for CO<sub>2</sub> reforming of CH<sub>4</sub> on Ni<sub>13</sub>/t-ZrO<sub>2</sub>(101) from DFT calculation (0 K and 1 bar) with ZPE correction (black line) and Gibbs free energy profile (873 K and 1bar) (red line)

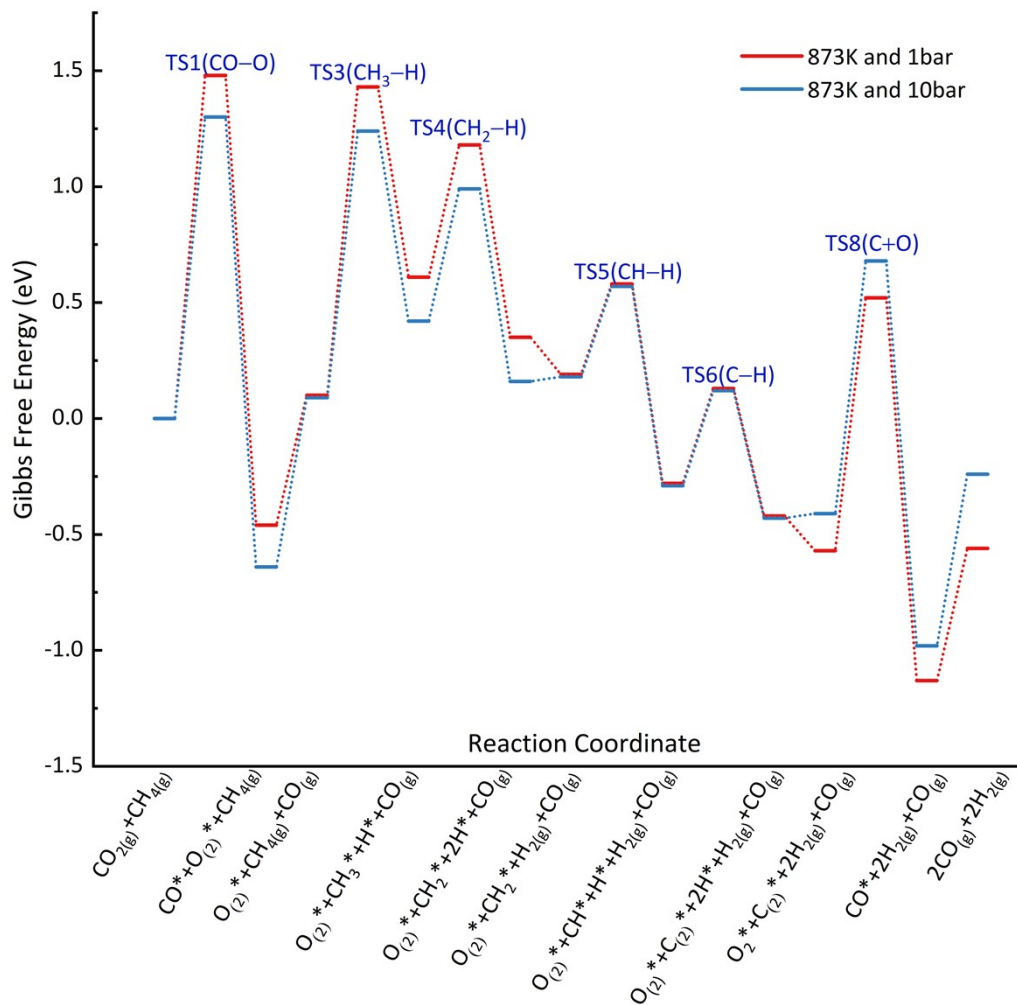

**Figure S3.** Simplified Gibbs free energy profile of  $\text{CO}_2$  reforming of  $\text{CH}_4$  on  $\text{Ni}_{13}/t\text{-ZrO}_2(101)$  under 873K with 1bar (red line) and 873K with 10bar (blue line) conditions, respectively.

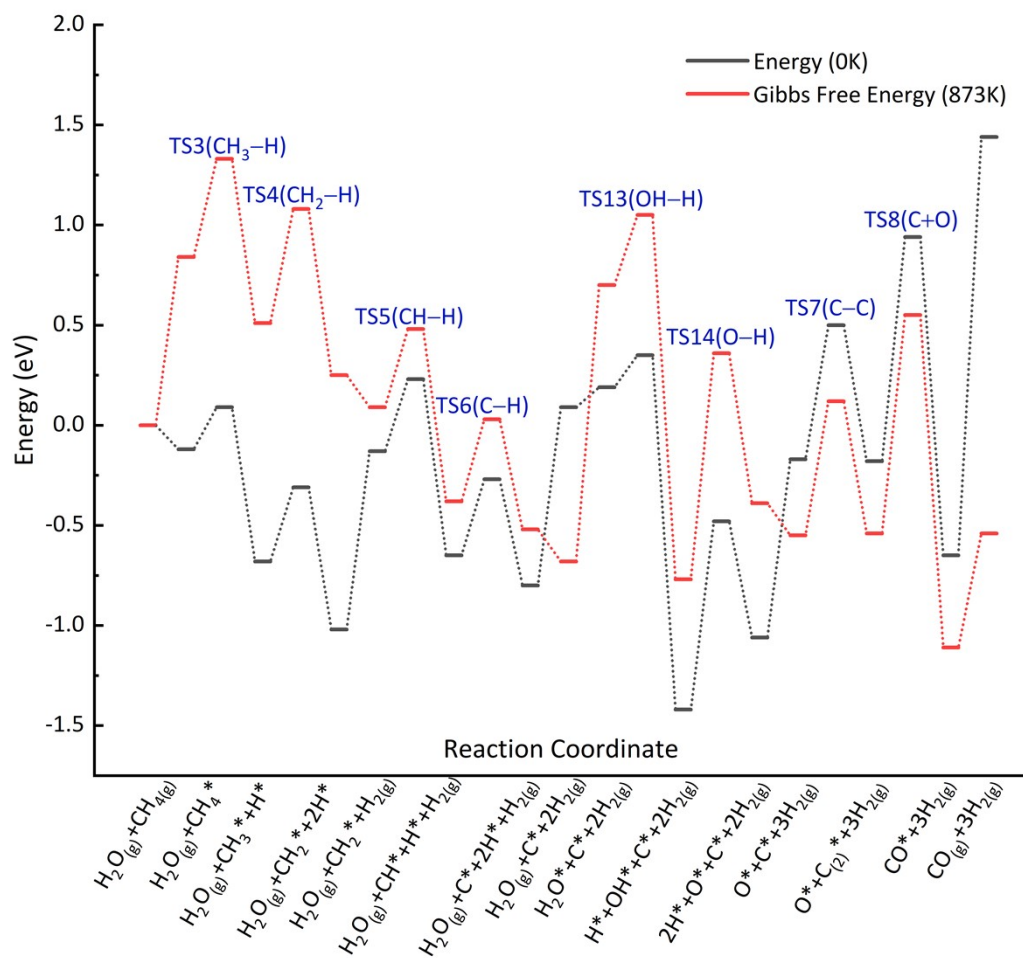

**Figure S4.** Potential Energy surface of possible pathway for steam reforming of CH<sub>4</sub> on Ni<sub>13</sub>/t-ZrO<sub>2</sub>(101) from DFT calculation (0 K and 1 bar) with ZPE correction (black line) and the Gibbs free energy profile (873 K and 1bar) (red line)

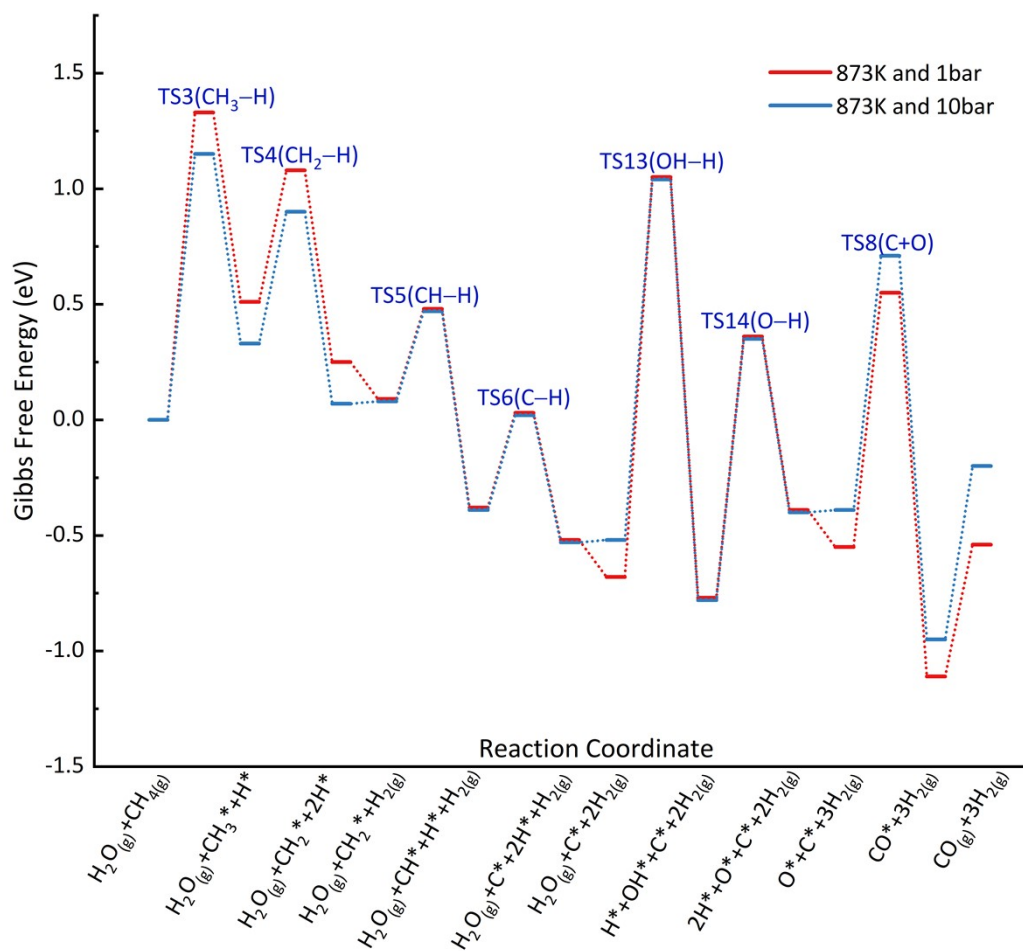

**Figure S5.** Simplified Gibbs free energy profile of H<sub>2</sub>O reforming of CH<sub>4</sub> on Ni<sub>13</sub>/t-ZrO<sub>2</sub>(101) under 873K with 1bar (red line) and 873K with 10bar (blue line) conditions, respectively.

**TableS1.** Forward reaction rate constant ( $k$ ,  $s^{-1}$ ) for elementary reactions in methane reforming on Ni/t-ZrO<sub>2</sub> catalyst under different conditions.

| Reactions                                | TS   | $k$ (873K; 1bar)       | $k$ (873K; 10bar)      | $k$ (873K; 30bar)      | $k$ (973K; 10bar)      |
|------------------------------------------|------|------------------------|------------------------|------------------------|------------------------|
| CO <sub>2</sub> → CO+O                   | TS1  | 5.56×10 <sup>04</sup>  | 6.03×10 <sup>05</sup>  | 1.74×10 <sup>06</sup>  | 5.89×10 <sup>05</sup>  |
| O <sub>(1)</sub> → O <sub>(2)</sub>      | TS2  | 1.18×10 <sup>11</sup>  | 1.18×10 <sup>11</sup>  | 1.18×10 <sup>11</sup>  | 1.75×10 <sup>11</sup>  |
| CH <sub>4</sub> → CH <sub>3</sub> +H     | TS3  | 4.05×10 <sup>05</sup>  | 4.40×10 <sup>06</sup>  | 1.27×10 <sup>07</sup>  | 5.01×10 <sup>06</sup>  |
| CH <sub>3</sub> → CH <sub>2</sub> +H     | TS4  | 9.56×10 <sup>09</sup>  | 9.56×10 <sup>09</sup>  | 9.56×10 <sup>09</sup>  | 1.62×10 <sup>10</sup>  |
| CH <sub>2</sub> → CH+H                   | TS5  | 1.04×10 <sup>11</sup>  | 1.04×10 <sup>11</sup>  | 1.04×10 <sup>11</sup>  | 1.75×10 <sup>11</sup>  |
| CH → C+H                                 | TS6  | 7.96×10 <sup>10</sup>  | 7.96×10 <sup>10</sup>  | 7.96×10 <sup>10</sup>  | 1.38×10 <sup>11</sup>  |
| C <sub>(1)</sub> → C <sub>(2)</sub>      | TS7  | 2.54×10 <sup>09</sup>  | 2.54×10 <sup>09</sup>  | 2.54×10 <sup>09</sup>  | 7.05×10 <sup>09</sup>  |
| C <sub>(2)</sub> +O → CO                 | TS8  | 9.74×10 <sup>06</sup>  | 9.74×10 <sup>06</sup>  | 9.74×10 <sup>06</sup>  | 5.39×10 <sup>07</sup>  |
| CH <sub>3</sub> +O → CH <sub>3</sub> O   | TS9  | 1.01×10 <sup>01</sup>  | 1.01×10 <sup>01</sup>  | 1.01×10 <sup>01</sup>  | 1.00×10 <sup>02</sup>  |
| CH <sub>2</sub> +O → CH <sub>2</sub> O   | TS10 | 1.12×10 <sup>-01</sup> | 1.12×10 <sup>-01</sup> | 1.12×10 <sup>-01</sup> | 1.77×10 <sup>00</sup>  |
| CH+O → CHO                               | TS11 | 1.75×10 <sup>-02</sup> | 1.75×10 <sup>-02</sup> | 1.75×10 <sup>-02</sup> | 7.68×10 <sup>-01</sup> |
| O+H → OH                                 | TS12 | 1.65×10 <sup>07</sup>  | 1.65×10 <sup>07</sup>  | 1.65×10 <sup>07</sup>  | 8.68×10 <sup>07</sup>  |
| H <sub>2</sub> O → OH+H                  | TS13 | 1.55×10 <sup>03</sup>  | 1.93×10 <sup>04</sup>  | 6.34×10 <sup>04</sup>  | 2.68×10 <sup>04</sup>  |
| OH → O+H                                 | TS14 | 5.73×10 <sup>06</sup>  | 5.73×10 <sup>06</sup>  | 5.73×10 <sup>06</sup>  | 1.64×10 <sup>07</sup>  |
| H+H → H <sub>2</sub>                     | TS15 | 1.54×10 <sup>11</sup>  | 1.54×10 <sup>11</sup>  | 1.54×10 <sup>11</sup>  | 2.81×10 <sup>11</sup>  |
| CH <sub>4</sub> +O → CH <sub>3</sub> +OH | TS16 | 1.63×10 <sup>02</sup>  | 1.77×10 <sup>03</sup>  | 5.12×10 <sup>03</sup>  | 1.04×10 <sup>04</sup>  |
| CH <sub>4</sub> +O → CH <sub>3</sub> O+H | TS17 | 1.93×10 <sup>04</sup>  | 2.09×10 <sup>05</sup>  | 6.03×10 <sup>05</sup>  | 5.23×10 <sup>05</sup>  |

### Micro-kinetics

Example: The rate equation of dry reforming of CH<sub>4</sub>

Such as shown in Figure S2 and Figure S4, the highest points in energy profile of reforming of CH<sub>4</sub> with CO<sub>2</sub> and H<sub>2</sub>O at 873K are the transition state of CO<sub>2</sub> and CH<sub>4</sub> dissociation, respectively. For example: the micro-kinetic model of dry reforming of CH<sub>4</sub> with Gibbs free energy is listed as follows: firstly, CO<sub>2</sub> molecule adsorbs on the surface (Eq. 1); and then dissociation on site (Eq. 2);

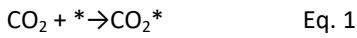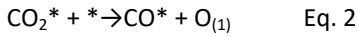

The rate equation of Eq.2 can be expressed as equation (1):

$$r = r_2 = k_2 [\text{CO}_2^*] [^*] \quad (1)$$

Where  $k_2$  is the rate constant of CO<sub>2</sub> dissociation. Since all the other steps are assumed to be in quasi-equilibrium, so  $[\text{CO}_2^*]$  can be expressed as equations (3):

$$k_+ [\text{CO}_2] [^*] = k_- [\text{CO}_2^*] \quad (2)$$

$$[\text{CO}_2^*] = \frac{k_+ [\text{CO}_2] [^*]}{k_-} = K_1 [\text{CO}_2] [^*] \quad (3)$$

Where  $K_1$  is the equilibrium constant of CO<sub>2</sub> adsorption and desorption. So Substitute the equations (3) to (1), we can get the rate equation dry reforming of CH<sub>4</sub>, which the result is consistent with our thermodynamics.

$$r = k_2 K_1 [\text{CO}_2] [^*] \quad (4)$$

**Table S2.** Computed activation energy ( $E_a$ , eV) and reaction energy ( $\Delta H$ , eV) of individual elementary reactions on the Ni(111) surface reported in literature along with the computational methods

| Reactions                                                    | $E_a$ | $\Delta H$ | Methods                    |
|--------------------------------------------------------------|-------|------------|----------------------------|
| $\text{CO}_2 \rightarrow \text{CO} + \text{O}$               | 0.48  | -0.82      | GGA-BEEF-vdw <sup>1</sup>  |
|                                                              | 0.61  | -1.04      | GGA-PW91 <sup>2</sup>      |
|                                                              | 0.55  | -0.36      | GGA-PBE <sup>3</sup>       |
|                                                              | 0.78  | -1.02      | GGA-PBE <sup>4</sup>       |
|                                                              | 0.45  | -1.02      | GGA-PBE <sup>5</sup>       |
|                                                              | 0.47  | -1.08      | GGA-PBE-D3 <sup>6</sup>    |
| $\text{CH}_4 \rightarrow \text{CH}_3 + \text{H}$             | 1.21  | 0.55       | GGA- BEEF-vdw <sup>1</sup> |
|                                                              | 1.14  | 0.49       | GGA-RPBE <sup>7</sup>      |
|                                                              | 1.17  | 0.36       | GGA-PBE <sup>3</sup>       |
| $\text{CH}_3 \rightarrow \text{CH}_2 + \text{H}$             | 0.87  | 0.33       | GGA- BEEF-vdw <sup>1</sup> |
|                                                              | 0.73  | -0.22      | GGA-RPBE <sup>7</sup>      |
|                                                              | 0.82  | 0.29       | GGA-PBE <sup>3</sup>       |
| $\text{CH}_2 \rightarrow \text{CH} + \text{H}$               | 0.43  | -0.16      | GGA- BEEF-vdw <sup>1</sup> |
|                                                              | 0.25  | -0.55      | GGA-RPBE <sup>7</sup>      |
|                                                              | 0.37  | 0.29       | GGA-PBE <sup>3</sup>       |
| $\text{CH} \rightarrow \text{C} + \text{H}$                  | 1.45  | 0.64       | GGA- BEEF-vdw <sup>1</sup> |
|                                                              | 1.17  | 0.30       | GGA-RPBE <sup>7</sup>      |
|                                                              | 1.37  | 1.21       | GGA-PBE <sup>3</sup>       |
| $\text{H}_{2(\text{g})} \rightarrow 2\text{H}$               | 0.25  | -0.88      | GGA-RPBE <sup>7</sup>      |
| $\text{H}_2\text{O} \rightarrow \text{OH} + \text{H}$        | 1.00  | -0.19      | GGA- BEEF-vdw <sup>8</sup> |
|                                                              | 0.97  | -0.22      | GGA-PBE <sup>9</sup>       |
| $\text{OH} \rightarrow \text{O} + \text{H}$                  | 1.31  | 0.09       | GGA- BEEF-vdw <sup>8</sup> |
|                                                              | 1.19  | -0.17      | GGA-PBE <sup>9</sup>       |
| $\text{CH}_4 + \text{O} \rightarrow \text{CH}_3 + \text{OH}$ | 1.66  | 0.54       | GGA- BEEF-vdw <sup>1</sup> |
| $\text{CH}_3 + \text{O} \rightarrow \text{CH}_3\text{O}$     | 0.94  | -0.53      | GGA-PBE <sup>3</sup>       |
| $\text{CH}_2 + \text{O} \rightarrow \text{CH}_2\text{O}$     | 0.78  | -0.25      | GGA-PBE <sup>3</sup>       |
| $\text{CH} + \text{O} \rightarrow \text{CHO}$                | 1.13  | 0.41       | GGA- BEEF-vdw <sup>1</sup> |
|                                                              | 0.80  | -0.51      | GGA-PBE <sup>3</sup>       |
| $\text{C} + \text{O} \rightarrow \text{CO}$                  | 1.30  | -1.72      | GGA- BEEF-vdw <sup>1</sup> |
|                                                              | 0.64  | -2.51      | GGA-PBE <sup>3</sup>       |



## References

- 1 J. Niu, J. Ran and D. Chen, *Appl. Surf. Sci.*, 2020, **513**, 145840-145850.
- 2 M.-C. Silaghi, A. Comas-Vives and C. Copéret, *ACS Catal.*, 2016, **6**, 4501-4505.
- 3 S.-G. Wang, X.-Y. Liao, J. Hu, D.-B. Cao, Y.-W. Li, J. Wang and H. Jiao, *Surf. Sci.*, 2007, **601**, 1271-1284.
- 4 S.-G. Wang, D.-B. Cao, Y.-W. Li, J. Wang and H. Jiao, *J. Phys. Chem. B*, 2006, **110**, 9976-9983.
- 5 J. Huang, X. Li, X. Wang, X. Fang, H. Wang and X. Xu, *J. CO<sub>2</sub> Util.*, 2019, **33**, 55-63.
- 6 P. Wu, Y. Tao, H. Ling, Z. Chen, J. Ding, X. Zeng, X. Liao, C. Stampfl and J. Huang, *ACS Catal.*, 2019, **9**, 10060-10069.
- 7 J. Li, E. Croiset and L. Ricardez-Sandoval, *Chem. Phys. Lett.*, 2015, **639**, 205-210.
- 8 J. Niu, Y. Wang, Y. Qi, A. H. Dam and D. Chen, *Fuel*, 2020, **266**, 117143-117154.
- 9 L. Zhu, C. Liu, X. Wen, Y.-W. Li and H. Jiao, *Catal. Sci. Technol.*, 2019, **9**, 199-212.
